# Supplementary material for: PAK1 Promotes Intestinal Tumor Initiation
Source: Oxford University Press journal article supplement (doi:10.1158/1940-6207.capr-15-0205-t), 2015-08-24
Supplement: 19406207capr150205t-sup-149942_2_supp_3082964_nsc7zx.docx [file 19406207capr150205t-sup-149942_2_supp_3082964_nsc7zx.docx]

**Supplementary table 1**

| **Antibody** | **Dilution** | **Application** | **Company** | **Catalog number** |
| --- | --- | --- | --- | --- |
| p65 | 1:800 | IHC | Cell Signaling | 8242 |
| PAK1 | 1:75 | IHC | Cell Signaling | 2602 |
| PPARγ (H-100) | 1:100 | IHC | Santa Cruz | sc-7196 |
| p-AKT1 (Thr 308) | 1:1000 | IHC | Santa Cruz | sc-135650 |
| p-AKT (Ser 473) | 1:1000 | IHC | Santa Cruz | sc-101629 |
| p-mTOR (Ser2448) | 1:50 | IHC | Cell signaling | 2971 |
| c-Myc | 1:1000 | IHC | Abcam | ab39688 |
| Cyclin D1 | 1:50 | IHC | Cell Signaling | 2978S |
| β-catenin | 1:1000 | IHC | BD Transduction Laboratories | 610513 |
| p-β-catenin (Ser 675) | 1:100 | IHC | Cell Signaling | 4176 |
